# Supplementary material for: Increased α‐tocopherol metabolism in horses with equine neuroaxonal dystrophy
Source: PubMed Central journal article supplement — J Vet Intern Med. 2021 Jul 31;35(5):2473–85. doi: 10.1111/jvim.16233 (PMC8478026; doi:10.1111/jvim.16233), 2021-07-31
Supplement: JVIM-35-2473-s002.pdf [file JVIM-35-2473-s002.pdf]

**Table S1:** Demographic information of all horses assayed in the proof of concept (POC) study.  
QH=Quarter Horse; TB=Thoroughbred, PM=subsequently postmortem-confirmed

| <b>ID</b> | <b>Sex</b> | <b>Age</b> | <b>Breed</b>  | <b>Disease Status</b> | <b>Weight (kg)</b> |
|-----------|------------|------------|---------------|-----------------------|--------------------|
| 1         | Mare       | 14         | QH            | eNAD/EDM (PM)         | 502                |
| 2         | Mare       | 14         | QH            | eNAD/EDM (PM)         | 520                |
| 3         | Mare       | 7          | QH            | eNAD/EDM              | 500                |
| 4         | Gelding    | 6          | QH            | eNAD/EDM              | 440                |
| 5         | Mare       | 7          | Hanoverian/TB | eNAD/EDM (PM)         | 545                |
| 6         | Gelding    | 13         | TB/Hackney    | Control               | 578                |
| 7         | Mare       | 13         | TB            | Control               | 472                |
| 8         | Mare       | 12         | QH            | Control               | 517                |
| 9         | Mare       | 7          | Oldenburg/TB  | Control               | 484                |
| 10        | Gelding    | 8          | QH            | Control               | 590                |
| 11        | Mare       | 4          | TB            | Control               | 491                |

| <b>Table S2: Demographic information of all horses assayed in the validation study.</b>                                                                                                                           |            |            |              |                        |                    |
|-------------------------------------------------------------------------------------------------------------------------------------------------------------------------------------------------------------------|------------|------------|--------------|------------------------|--------------------|
| QH=Quarter Horse; Stbd=Standardbred; TB=Thoroughbred, WB=Warmblood, PM=subsequently postmortem-confirmed, no neuro= histologic assessment of central nervous system not performed at postmortem in control horses |            |            |              |                        |                    |
| <b>ID</b>                                                                                                                                                                                                         | <b>Sex</b> | <b>Age</b> | <b>Breed</b> | <b>Disease Status</b>  | <b>Weight (kg)</b> |
| 1                                                                                                                                                                                                                 | Mare       | 15         | QH           | eNAD/EDM (PM)          | 504                |
| 2                                                                                                                                                                                                                 | Mare       | 15         | QH           | eNAD/EDM (PM)          | 495                |
| 3                                                                                                                                                                                                                 | Mare       | 8          | QH           | eNAD/EDM               | 503                |
| 4                                                                                                                                                                                                                 | Stallion   | 1          | QH           | eNAD/EDM (PM)          | 320                |
| 5                                                                                                                                                                                                                 | Mare       | 17         | QH           | eNAD/EDM (PM)          | 506                |
| 6                                                                                                                                                                                                                 | Mare       | 7          | QH           | eNAD/EDM               | 544                |
| 7                                                                                                                                                                                                                 | Gelding    | 17         | WB           | CVCM (PM)              | 559                |
| 8                                                                                                                                                                                                                 | Stallion   | 1          | QH/TB        | CVCM (PM)              | 280                |
| 9                                                                                                                                                                                                                 | Stallion   | 1          | QH/TB        | CVCM (PM)              | 373                |
| 10                                                                                                                                                                                                                | Gelding    | 3          | WB           | CVCM (PM)              | 506                |
| 11                                                                                                                                                                                                                | Mare       | 28         | Pony         | CVCM (PM)              | 410                |
| 12                                                                                                                                                                                                                | Mare       | 4          | WB           | CVCM                   | 503                |
| 13                                                                                                                                                                                                                | Mare       | 8          | QH           | Control                | 538                |
| 14                                                                                                                                                                                                                | Mare       | 7          | TB           | Control                | 530                |
| 15                                                                                                                                                                                                                | Mare       | 11         | WB           | Control                | 622                |
| 16                                                                                                                                                                                                                | Mare       | 8          | WB           | Control                | 542                |
| 17                                                                                                                                                                                                                | Mare       | 15         | TB           | Control                | 616                |
| 18                                                                                                                                                                                                                | Mare       | 8          | TB/WB        | Control                | 538                |
| 19                                                                                                                                                                                                                | Gelding    | 15         | TB/Hackney   | Control                | 656                |
| 20                                                                                                                                                                                                                | Gelding    | 6          | TB           | Control                | 535                |
| 21                                                                                                                                                                                                                | Mare       | 9          | QH/WB        | Control                | 566                |
| 22                                                                                                                                                                                                                | Mare       | 11         | QH           | Control                | 558                |
| 23                                                                                                                                                                                                                | Gelding    | 16         | QH           | Control                | 562                |
| 24                                                                                                                                                                                                                | Mare       | 14         | QH           | Control                | 576                |
| 25                                                                                                                                                                                                                | Mare       | 15         | QH           | Control                | 532                |
| 26                                                                                                                                                                                                                | Mare       | 14         | QH           | Control                | 535                |
| 27                                                                                                                                                                                                                | Gelding    | 12         | QH           | Control                | 611                |
| 28                                                                                                                                                                                                                | Mare       | 27         | TB           | Control                | 540                |
| 29                                                                                                                                                                                                                | Gelding    | 16         | TB           | Control                | 523                |
| 30                                                                                                                                                                                                                | Mare       | 26         | TB           | Control (PM; no neuro) | 535                |
| 31                                                                                                                                                                                                                | Mare       | 18         | TB           | Control (PM; no neuro) | 594                |
| 32                                                                                                                                                                                                                | Gelding    | 8          | QH           | Control                | 549                |
| 33                                                                                                                                                                                                                | Mare       | 22         | TB           | Control (PM; no neuro) | 542                |
| 34                                                                                                                                                                                                                | Mare       | 19         | TB           | Control                | 589                |
| 35                                                                                                                                                                                                                | Mare       | 5          | TB           | Control                | 572                |
| 36                                                                                                                                                                                                                | Mare       | 28         | QH           | Control (PM: no neuro) | 436                |
| 37                                                                                                                                                                                                                | Mare       | 17         | TB           | Control (PM; no neuro) | 595                |
| 38                                                                                                                                                                                                                | Gelding    | 11         | Stbd         | Control                | 553                |
| 39                                                                                                                                                                                                                | Gelding    | 8          | TB           | Control                | 549                |
| 40                                                                                                                                                                                                                | Gelding    | 1          | QH           | Control                | 310                |

|    |      |   |    |         |     |
|----|------|---|----|---------|-----|
| 41 | Mare | 1 | QH | Control | 308 |
|----|------|---|----|---------|-----|

**Table S3:** Demographic information for the horses used in the qRT-PCR and ddPCR assays. Age was calculated based on date of birth and date of necropsy. All horses underwent full neurologic necropsies. Horse 15 (blue) was excluded from the ddPCR assay. QH=Quarter Horse, WB=Warmblood, DWB=Dutch Warmblood, POA=Pony of the Americas, TB=Thoroughbred, CON=Control.

| Number | Sex      | Age | Breed      | Status   |
|--------|----------|-----|------------|----------|
| 1      | Mare     | 14  | QH         | eNAD/EDM |
| 2      | Mare     | 1.5 | QH         | eNAD/EDM |
| 3      | Mare     | 2   | QH         | eNAD/EDM |
| 4      | Mare     | 4   | QH         | eNAD/EDM |
| 5      | Mare     | 3   | QH         | eNAD/EDM |
| 6      | Stallion | 0.5 | Morgan     | eNAD/EDM |
| 7      | Gelding  | 3   | WB         | eNAD/EDM |
| 8      | Gelding  | 4   | WB         | eNAD/EDM |
| 9      | Mare     | 1   | DWB        | eNAD/EDM |
| 10     | Gelding  | 5   | Andalusian | eNAD/EDM |
| 11     | Mare     | 0.6 | QH         | eNAD/EDM |
| 12     | Mare     | 3   | QH         | eNAD/EDM |
| 13     | Mare     | 6   | QH         | CON      |
| 14     | Gelding  | 1.5 | QH         | CON      |
| 15     | Gelding  | 2   | QH         | CON      |
| 16     | Gelding  | 13  | QH         | CON      |
| 17     | Mare     | 0.5 | Percheron  | CON      |
| 18     | Mare     | 1   | POA        | CON      |
| 19     | Gelding  | 25  | QH         | CON      |
| 20     | Mare     | 18  | Paint      | CON      |
| 21     | Gelding  | 5   | TB         | CON      |
| 22     | Stallion | 16  | Friesian   | CON      |
| 23     | Mare     | 3   | QH         | CON      |
| 24     | Gelding  | 4   | Arabian    | CON      |

| <b>Table S4: Primer sequence for qRT-PCR and ddPCR assays.</b> |                                       |                |
|----------------------------------------------------------------|---------------------------------------|----------------|
| <b>Gene</b>                                                    | <b>Primer Sequence</b>                | <b>Purpose</b> |
| <i>ACTβ</i>                                                    | F – 5' AAGGAGAAGCTCTGCTATGTCG 3'      | qRT-PCR        |
|                                                                | R – 5' GGGCAGCTCGTAGCTCTTC 3'         |                |
| <i>HPRT1</i>                                                   | F – 5' ACCAGTCAACAGGGGACATAA 3'       | qRT-PCR        |
|                                                                | R – 5' CAACAATCAAGACATTCTTTCCAG 3'    |                |
| <i>GAPDH</i>                                                   | F – 5' AAGATTGTCAGCAATGCCTCC 3'       | qRT-PCR        |
|                                                                | R – 5' CCAGGAAATGAGCTTGACAAA 3'       |                |
| <i>LOC100062102</i>                                            | F – 5' TCCACCCTAAGTTCGTTGC 3'         | qRT-PCR        |
|                                                                | R – 5' CATATCCTTAGGTGCGATGG 3'        |                |
| <i>LOC100062102</i>                                            | F – 5' GTCCACCCTAAGTTCGTT 3'          | ddPCR          |
|                                                                | R – 5' GAAGGGCTGAAAGCAAAG 3'          |                |
|                                                                | Probe – 5' CAGGTATCTCTTCCAGGAGCCTC 3' |                |
