# Supplementary figures and images for: Increased α‐tocopherol metabolism in horses with equine neuroaxonal dystrophy
Source: PubMed Central journal article supplement — J Vet Intern Med. 2021 Jul 31;35(5):2473–85. doi: 10.1111/jvim.16233 (PMC8478026; doi:10.1111/jvim.16233), 2021-07-31

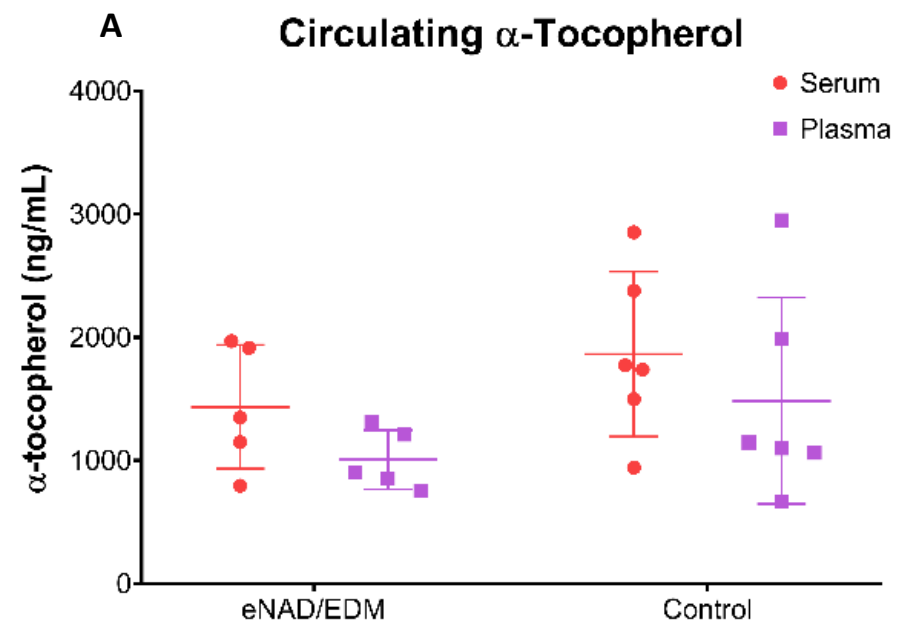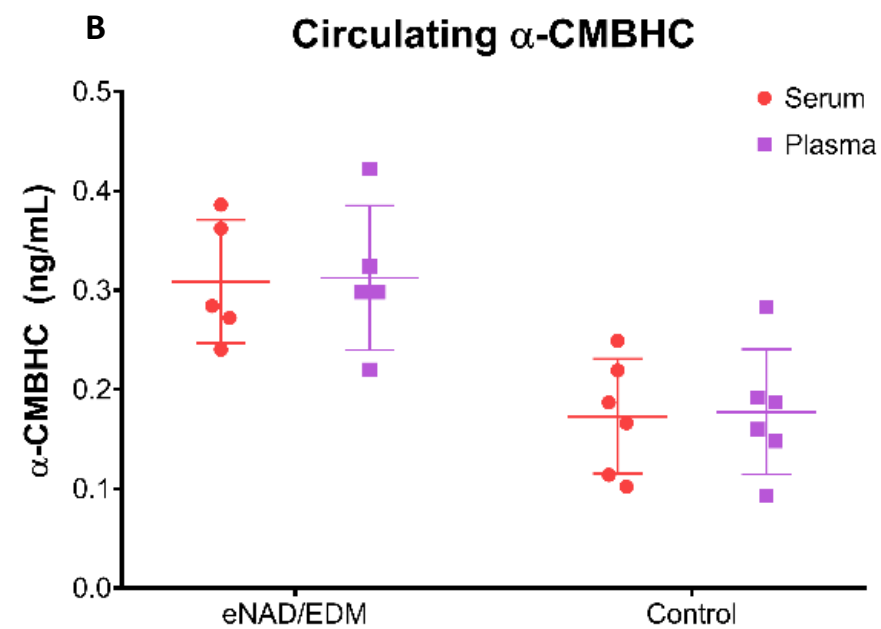

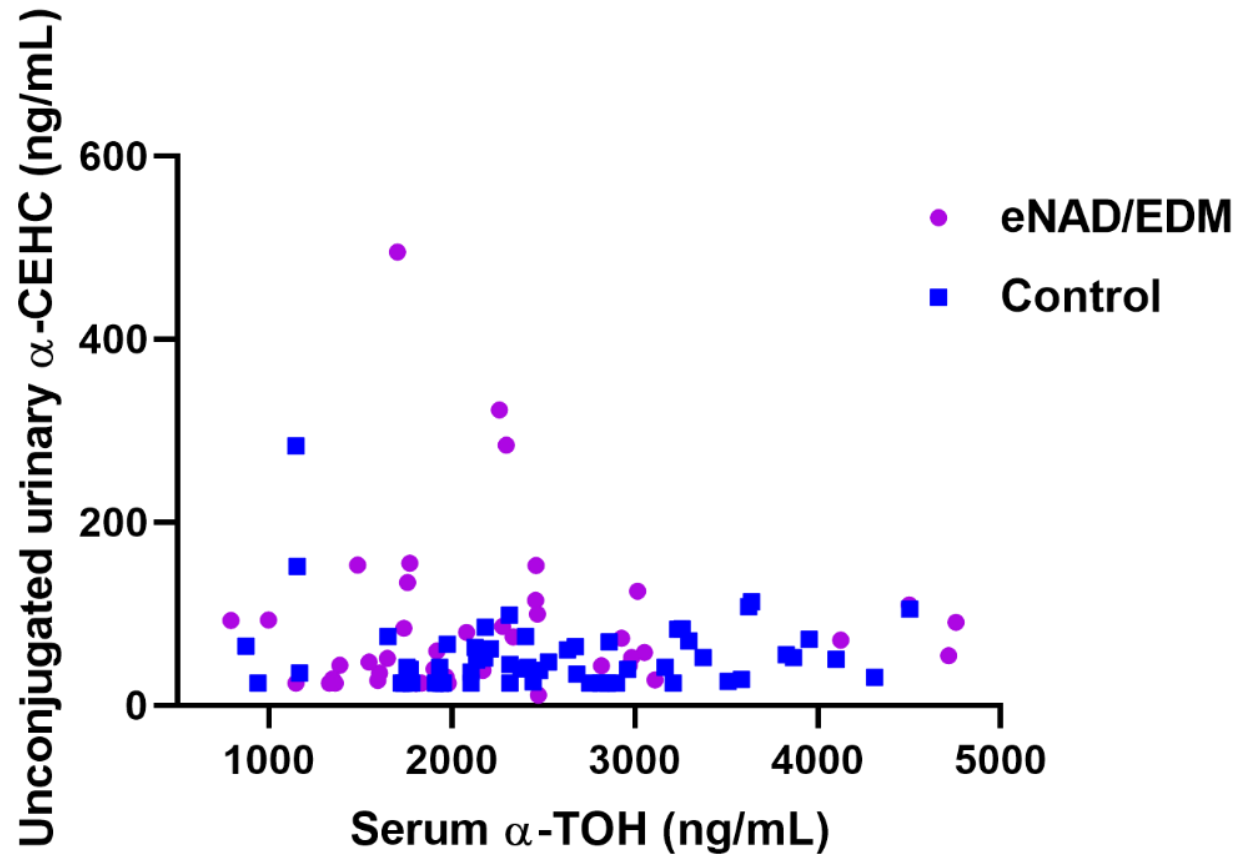

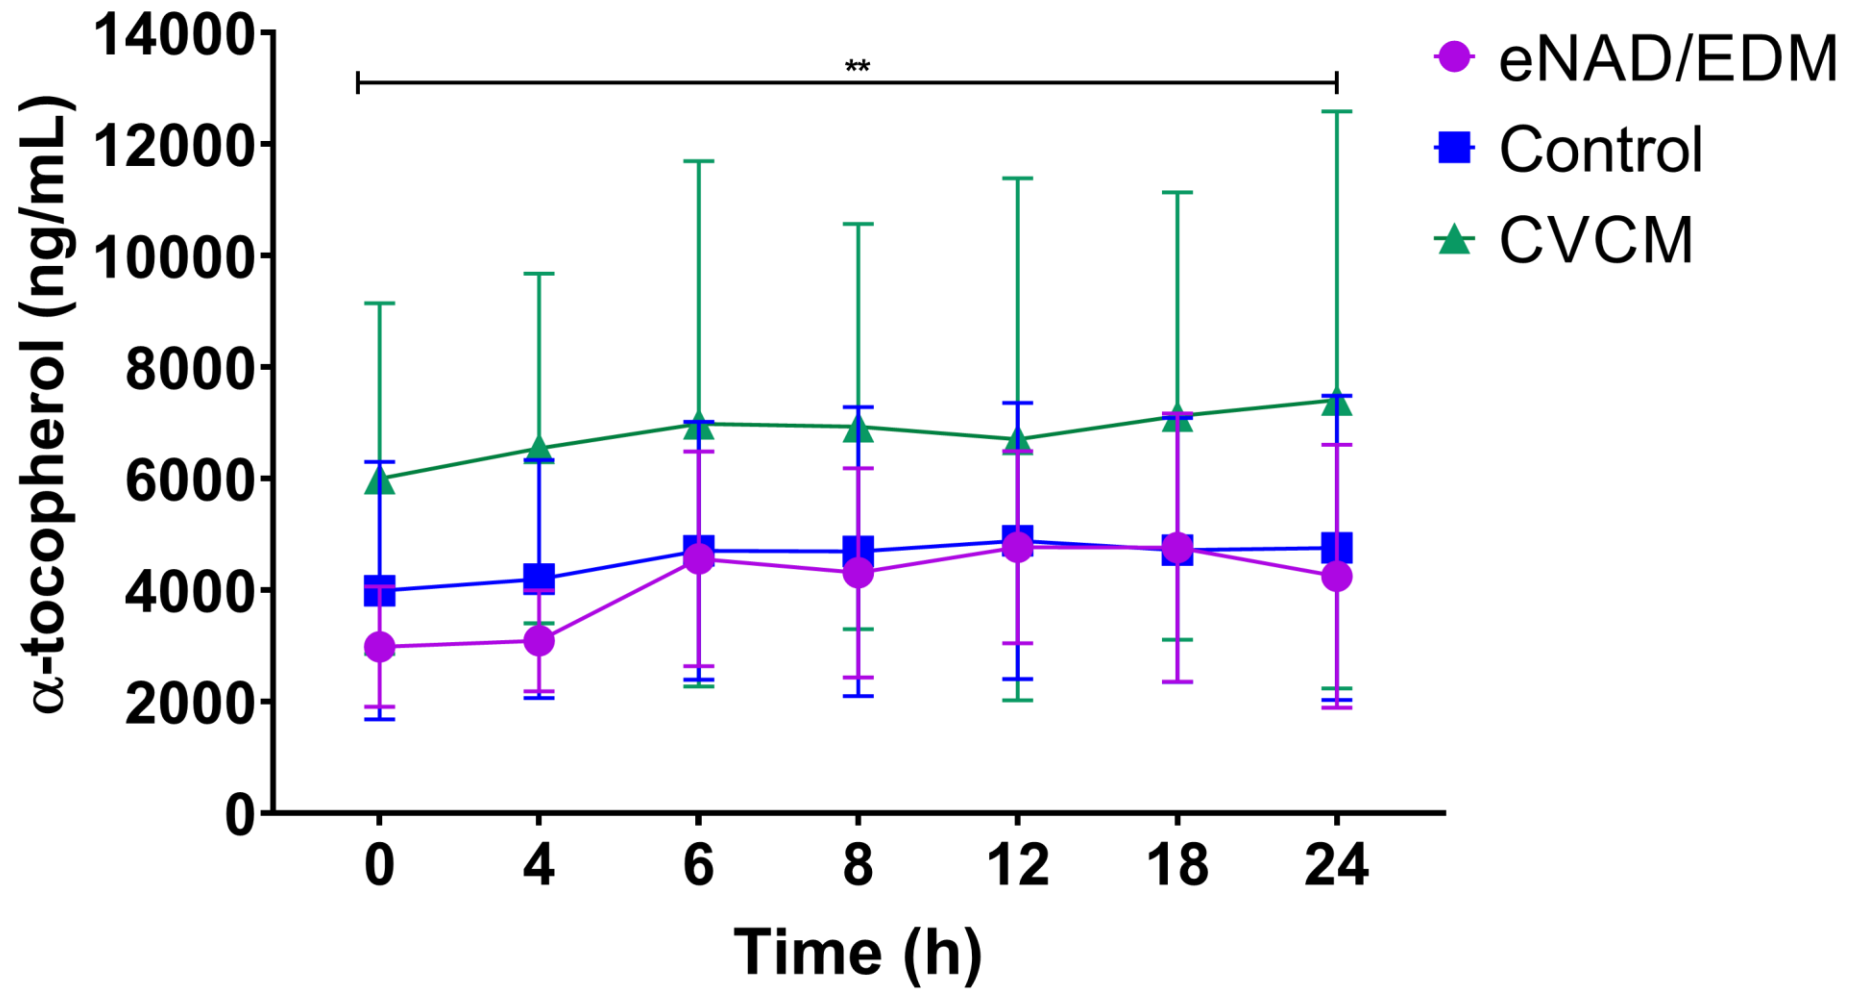

Supplement: JVIM-35-2473-s001.pdf [file JVIM-35-2473-s001.pdf]
